# Supplementary material
Source: publisher figshare collection journal article supplement (https://microbiology.figshare.com/ndownloader/files/20065598)
Supplement: Supplementary file 1 [file 20065598]

## Sheet: Table S9
Sample	ViPR Classification	Origin	Collection Year
KF954946	DENV-3-III	China	2013
JQ922557	DENV-3 III	India	2005
KU509286	DENV-3 III	India	2011
EU687233	DENV-3 III	USA	2002
GQ252674	DENV-3 III	Sri Lanka	1997
FJ882573	DENV-3 III	Sri Lanka	1993
GQ199887	DENV-3 III	Sri Lanka	1983
JQ922555	DENV-3 III	India	1966
HM631854	DENV-3 II	Cambodia	2008
KY586703	DENV-3 II	Thailand	2006
KU509280	DENV-3 II	Thailand	2011
FJ744730	DENV-3 II	Thailand	2001
KY586814	DENV-3 II	Thailand	2006
DQ863638	DENV-3 II	Thailand	1973
KC762684	DENV-3 I	Indonesia	2007
KY863456	DENV-3 I	Indonesia	2016
KC762691	DENV-3 I	Indonesia	2008
KC762692	DENV-3 I	Indonesia	2010
KY794787	DENV-3 I	Papua New Guinea	2007
MF004386	DENV-3 I	Malaysia	2012
AB189128	DENV-3 I	Indonesia	1998
KU509279	DENV-3 I	Philippines	2008
FJ898455	DENV-3 I	Cook Islands	1991
KU725666	DENV-3 V	Unkown	Unknown
